# Supplementary material
Source: Research Square preprint supplement (doi:10.21203/rs.3.rs-9211672/v1)

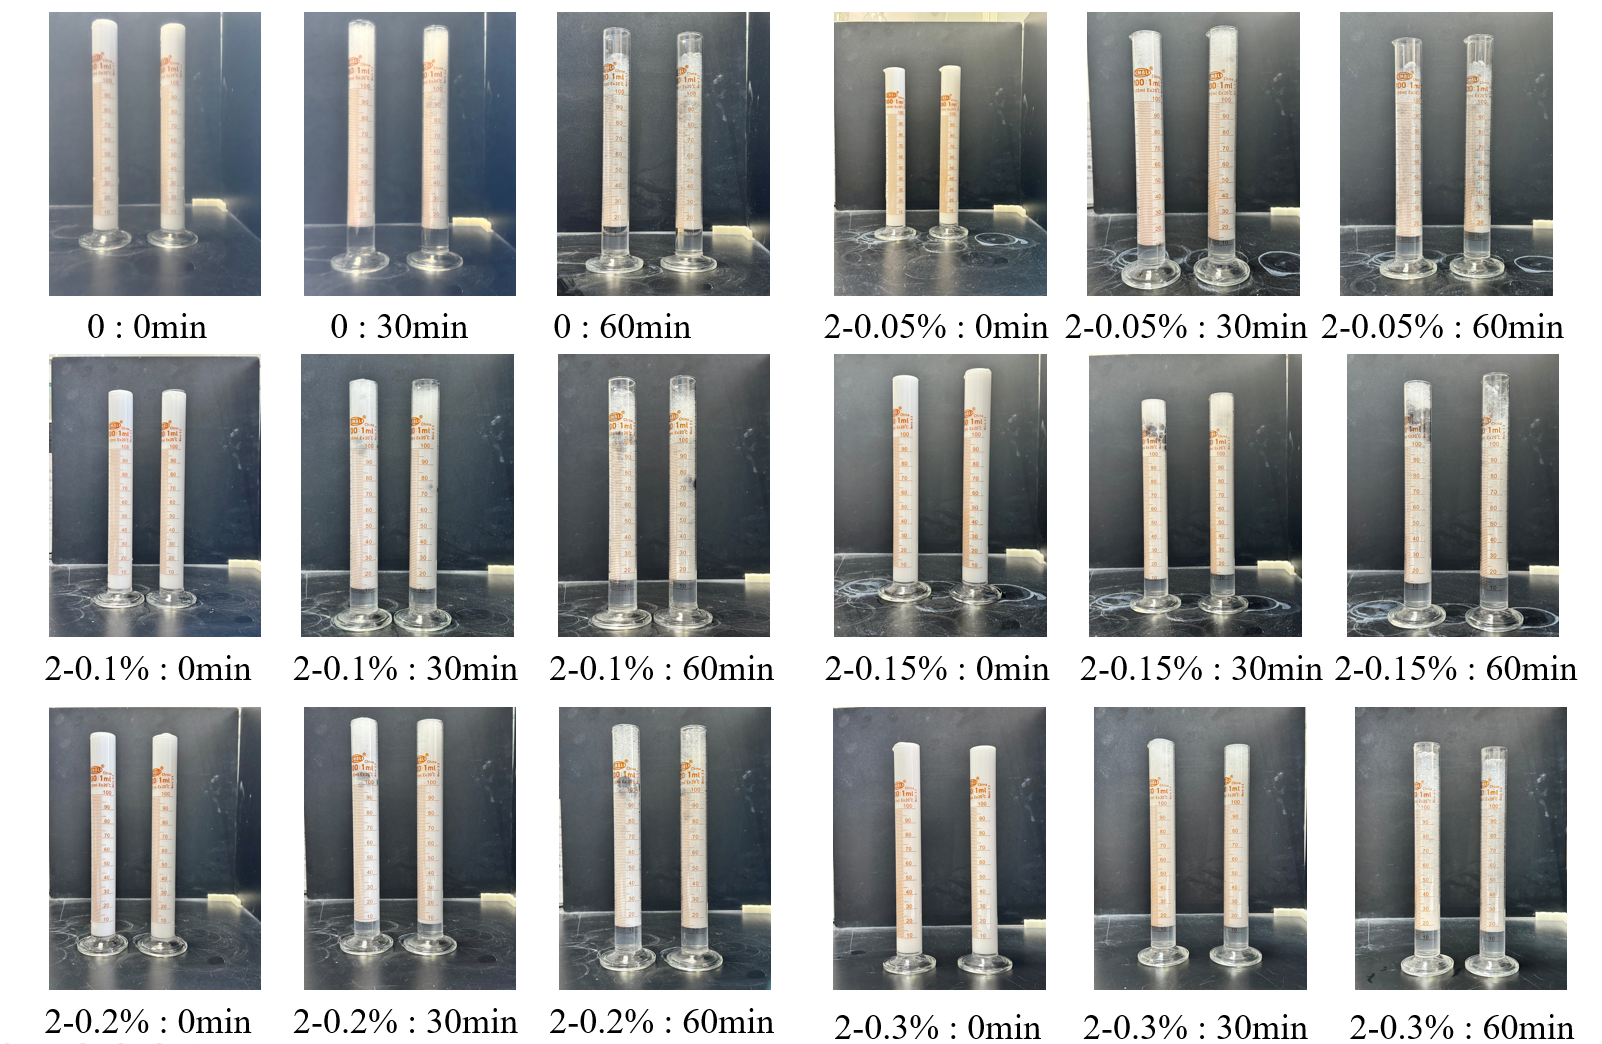


Fig.S1 Temporal Variation of Foam Height

Supplement: Supplementary file 1 [file 64f313dd20d33b3387e19ae2.docx]
